# Evaluation of Fourier Transform Infrared spectroscopy (IR Biotyper) as a complement to Whole genome sequencing (WGS) to characterise *Enterobacter cloacae*, *Citrobacter freundii* and *Klebsiella pneumoniae* isolates recovered from hospital sinks

## Author names

Aranega-Bou P<sup>1</sup>(ORCID: 0000-0001-7415-6698), Cornbill C<sup>1</sup>, Rodger G<sup>2,3</sup>(ORCID: 0000-0001-6051-8985), Bird M<sup>2,4</sup>(ORCID: 0000-0001-9560-2861), Moore G<sup>1</sup>(ORCID: 0000-0001-6969-3528), Roohi A<sup>2</sup>, Hopkins KL<sup>4</sup>(ORCID 0000-0001-7279-5322), Hopkins S<sup>4</sup>(0000-0001-5179-5702), Ribeca P<sup>4,5,6</sup>(ORCID: 0000-0001-5599-3933), Stoesser N<sup>2,3#</sup>(ORCID: 0000-0002-4508-7969), Lipworth SI<sup>3#</sup>(0000-0001-5872-9214)

# Contributed equally

## Affiliation(s)

<sup>1</sup> Biosafety, Air and Water Microbiology Group, UK Health Security Agency, Porton Down, UK

<sup>2</sup> NIHR Health Protection Unit in Antimicrobial Resistance and Healthcare-associated Infection, University of Oxford, Oxford, UK

<sup>3</sup> Nuffield Department of Medicine, University of Oxford, Oxford, UK

<sup>4</sup> UK Health Security Agency, Colindale, UK

<sup>5</sup> NIHR Health Protection Unit in Genomics and Enabling Data, University of Warwick, Warwick, UK

<sup>6</sup> NIHR Health Protection Unit in Gastrointestinal Infections, University of Liverpool, Liverpool, UK

## Withdrawal statement

The authors have withdrawn their manuscript due to becoming aware of methodology issues related to the curation of the training set used to determine cut-off values for Biotyper cluster assignment and lack of replicate measurements on different days for the isolates analysed. It is therefore unclear whether the conclusions of the manuscript are founded and no further work is possible to correct these issues as the instrument is no longer available to the authors. If you have any questions, please contact the corresponding author.
